# Supplementary material
Source: publisher site journal article supplement (http://www.degruyter.com/publication/journal_key/IJEEPS/downloadAsset/IJEEPS_Manuscript%20Checklist_IJEEPS.pdf)
Supplement: Supplementary file 1 [file IJEEPS_Manuscript%20Checklist_IJEEPS.pdf]

## General format and length of article types accepted for submission

Word count: title page, abstract, tables, figures, references, abbreviations, appendices & supplementary material are excluded.

|                                  | Word count | Word count in abstract                                                              | Number of keywords | Number of Tables & Figures | Number of references | Article                                                                             |
|----------------------------------|------------|-------------------------------------------------------------------------------------|--------------------|----------------------------|----------------------|-------------------------------------------------------------------------------------|
| Research Article                 | 4000       | 250, structured<br><i>Objectives, Methods, Results and Conclusions</i>              | 3–6                | 8                          | 30                   | Structured into Introduction, Materials (Subjects) and methods, Results, Discussion |
| Review Article                   | 6000       | 200, unstructured/<br>structured<br><i>Background, Content, Summary and Outlook</i> | 3–6                | 8                          | 150                  | Structured                                                                          |
| Editorial                        | 1500       | n/a                                                                                 | n/a                | 1                          | 10                   | Structured or unstructured                                                          |
| Application and Practice Article | 4000       | 250, structured<br><i>Objectives, Methods, Results and Conclusions</i>              | 3–6                | 8                          | 30                   | Structured into Introduction, Materials (Subjects) and methods, Results, Discussion |

### When you submit your work, please ensure the following

- You have read the [Instructions for Authors](#).
- The manuscript is complete and uploaded correctly. The HTML version and/or the PDF file generated from the submitted files must be complete and approved.
- The language in which the manuscript was written is correct and has been checked by a native speaker or a professional language service, if applicable.
- The title page information includes the full title, short title, the full names of all authors (given name, middle initials, family name), and the full address, affiliation and the academic title of the corresponding author. The title page should also indicate the word count, the number of tables and figures, and whether the submission includes any supplementary material.
- All figures and tables have been uploaded and appear correctly at the end of the generated PDF.
- Abstract, keywords, list of abbreviations, tables and figures, and captions and legends are included, depending on the manuscript type.
- Manuscript is spell-checked and within the word limit for the type of article.
- References are in the correct format according to the Instructions for Authors.
- References mentioned in the reference list are cited in the text and vice versa.
